# Supplementary material for: Assignment of the methanol OH-stretch overtone spectrum using the pattern recognition method
Source: Royal Society of Chemistry journal article supplement (doi:10.1039/d4cp00757c), 2024-01-01
Supplement: d4cp00757c1.pdf [file d4cp00757c1.pdf]

# Assignment of the methanol OH-stretch overtone spectrum using the pattern recognition method

April 24, 2024

In this document, the reduced energy plots for the A and E components of methanol are presented in Figure 1 and Figure 2 respectively. The list of firmly assigned combination differences multiplets is given in Table 1 while the list of tentative assignments is given in Table 2.

Figures 3 and 4 depict the fitted spectrum and a zoom on a  $1.5 \text{ cm}^{-1}$  region around  $7200.75 \text{ cm}^{-1}$ .

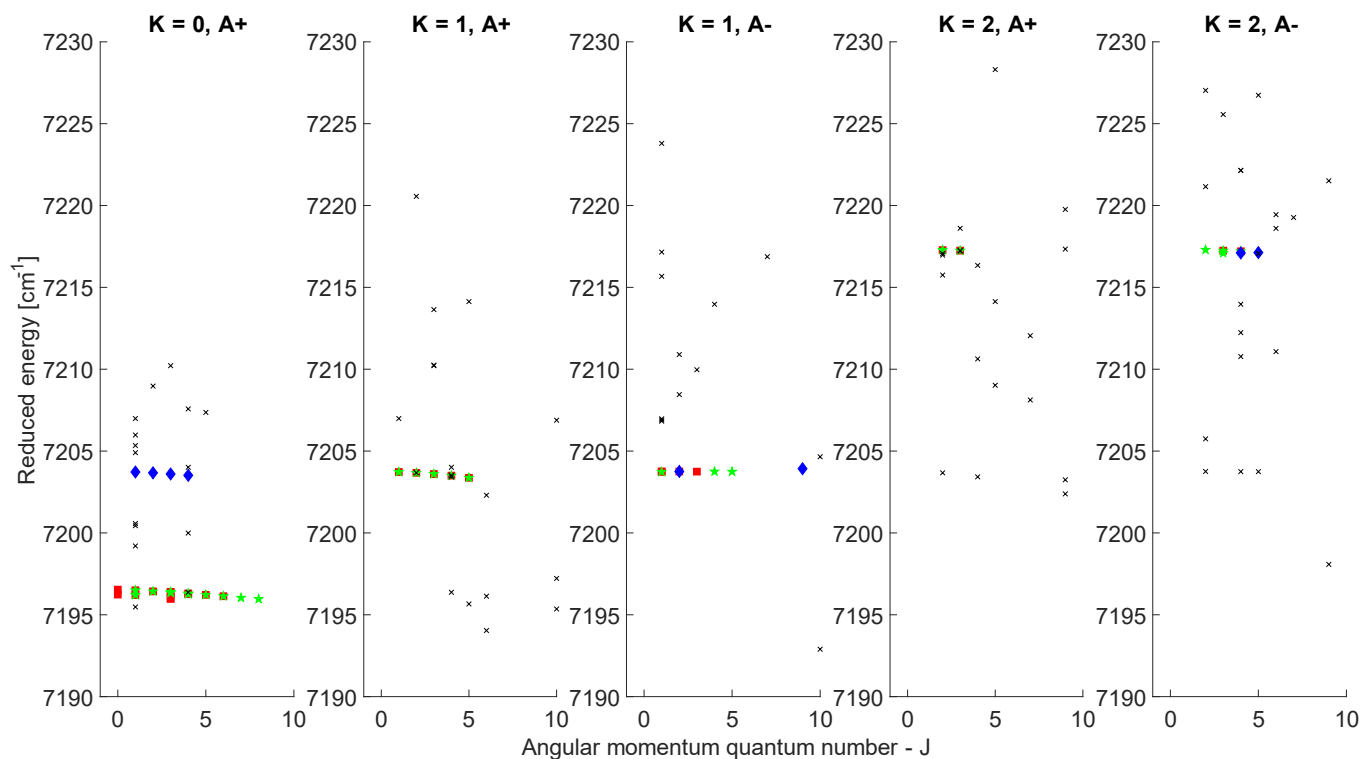

Figure 1: Reduced energy plot for the A component. Green stars are firmly confirmed CDMs, Red squares are CDMs detected by Rakovský *et al.* [Rakovský *et al.*, *Physical Chemistry Chemical physics*, 2021, **23**, 20193-20200]. Blue diamonds are tentative CDMs and black crosses are rejected CDMs.

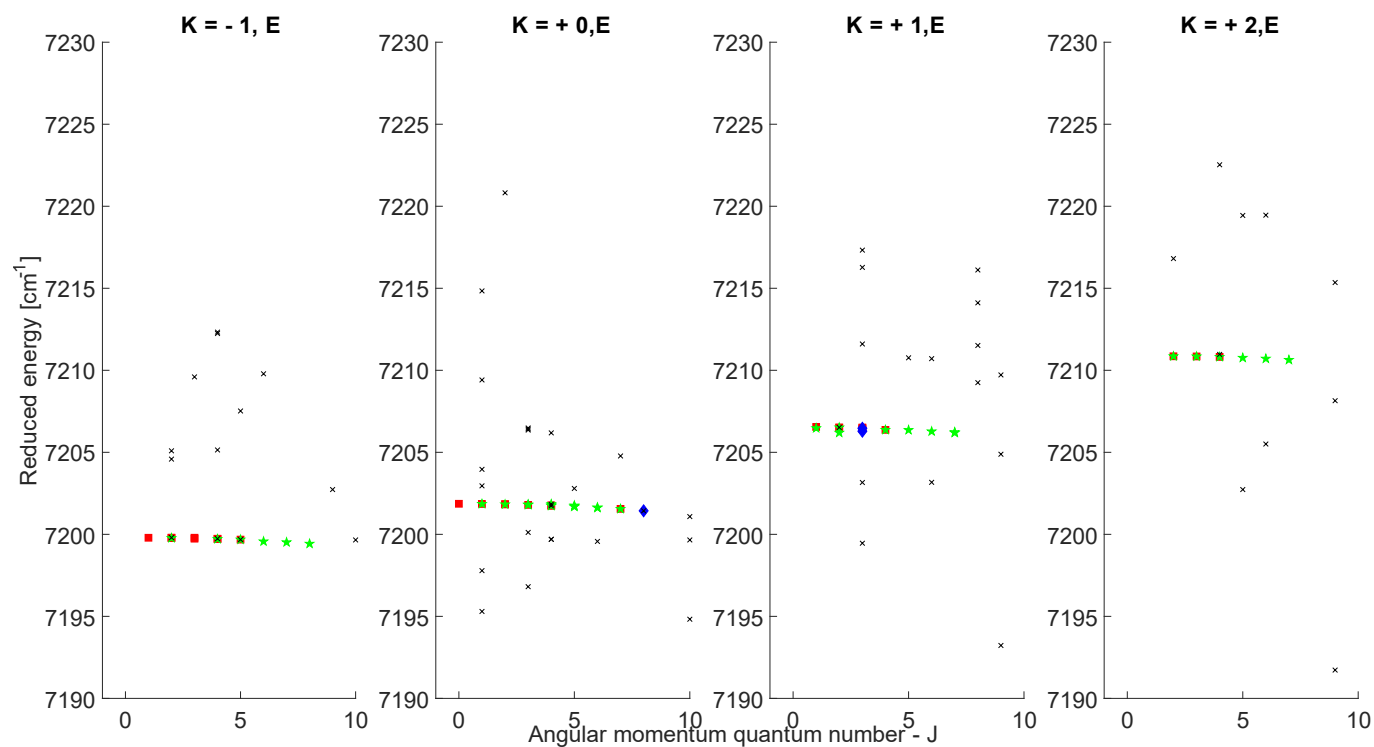

Figure 2: Reduced energy plot for the E component. Green stars are firmly confirmed assignments, Red squares are CDMs detected by Rakovský *et al.* Blue diamonds are tentative assignments and black crosses are rejected CDMs.

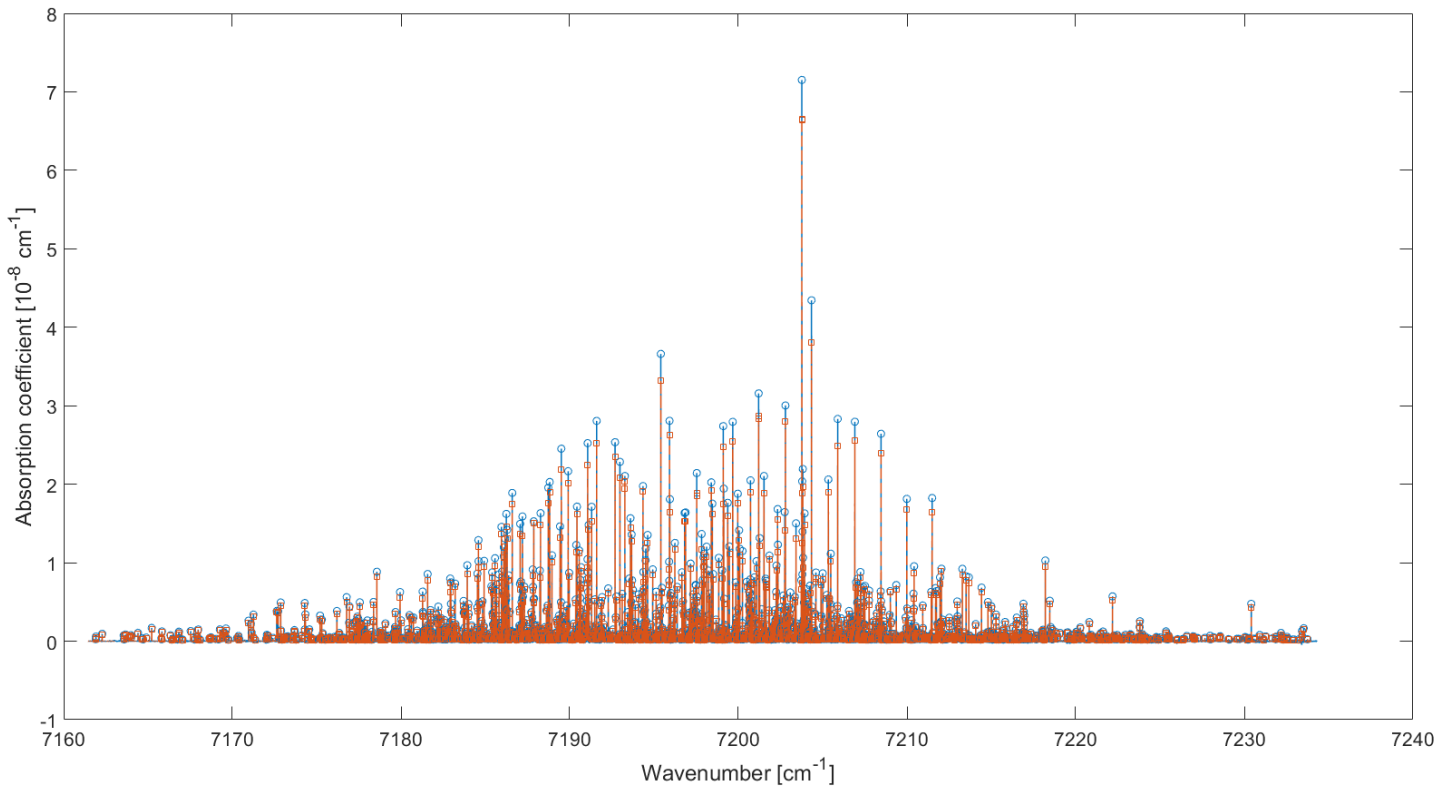

Figure 3: Absorption coefficient plotted against wavenumber. The blue line represents experimental data, with blue dots indicating the peaks of detected transitions. The red line represents data fitted using a sum of Gaussian functions, with red squares denoting the peaks of the Gaussian fits

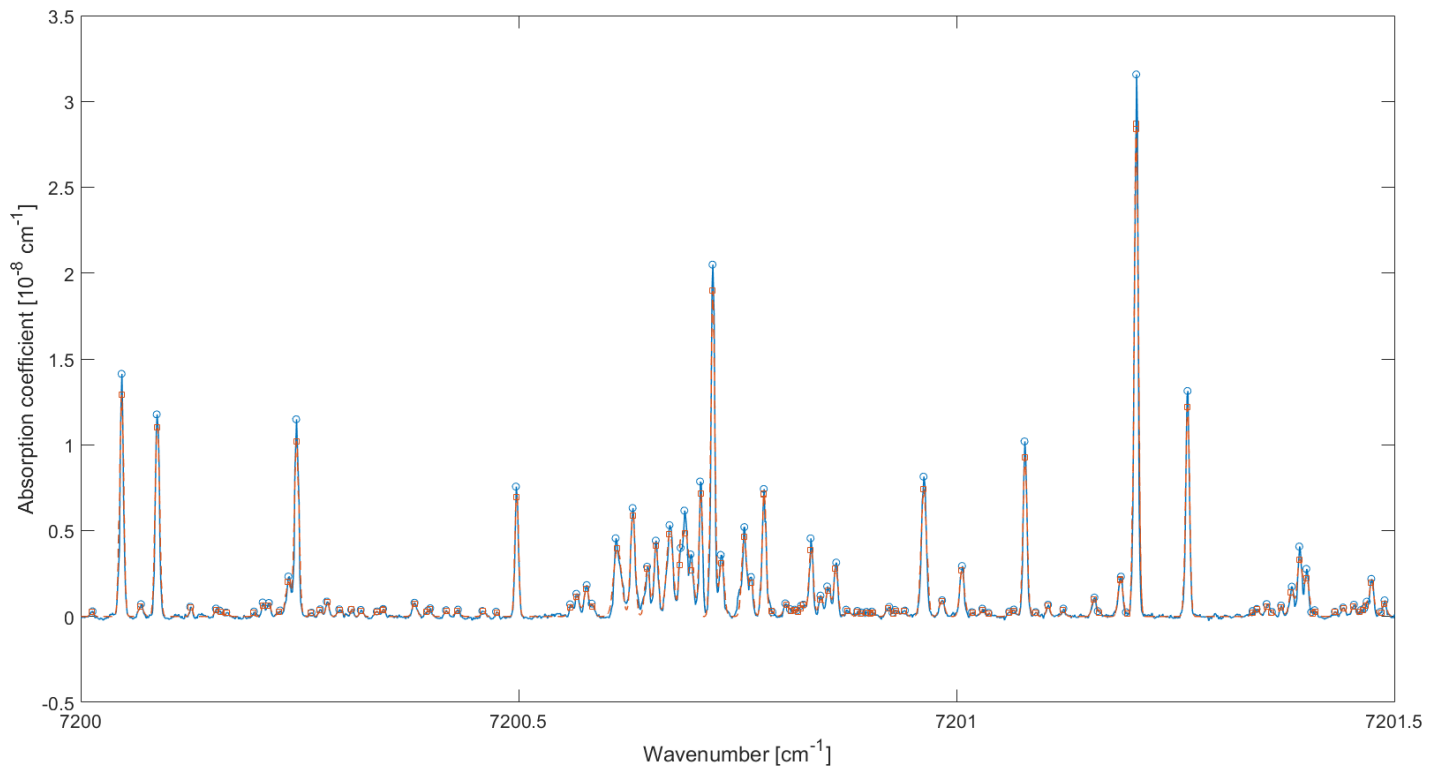

Figure 4: Zoom on a  $1.5 \text{ cm}^{-1}$  wide region around  $7200.75 \text{ cm}^{-1}$  of the absorption coefficient plotted against wavenumber. The blue line represents experimental data, with blue dots indicating the peaks of detected transitions. The red line represents data fitted using a sum of Gaussian functions, with red squares denoting the peaks of the Gaussian fits

Table 1: List of firmly assigned CDMs. The energy of the transitions are the experimental ones. Energies of non-observed transitions are labeled by a dash symbol.

| upper state | E (cm <sup>-1</sup> ) | lower state E (cm <sup>-1</sup> ), lines E (cm <sup>-1</sup> ) |                     |                     |                     |                     |                     |                     |                     |
|-------------|-----------------------|----------------------------------------------------------------|---------------------|---------------------|---------------------|---------------------|---------------------|---------------------|---------------------|
|             |                       | (0,0,+A)<br>0                                                  | (2,0,+A)<br>4.8405  | (1,1,-A)<br>11.7328 | (2,1,+A)<br>14.9043 |                     |                     |                     |                     |
| (1,0,+A)    | 7197.8218             | 7197.8218                                                      | 7192.9803           | 7186.0879           | 7182.9178           |                     |                     |                     |                     |
|             | 7198.1151             | 7198.1151                                                      | 7193.2733           | 7186.3817           | 7183.2108           |                     |                     |                     |                     |
| (2,0,+A)    |                       | (1,0,+A)<br>1.6135                                             | (3,0,+A)<br>9.6806  | (1,1,+A)<br>11.7049 | (2,1,-A)<br>14.9878 | (3,1,+A)<br>19.7031 |                     |                     |                     |
|             | 7201.2812             | 7199.6677                                                      | 7191.5997           | 7189.5761           | 7186.2931           | 7181.5781           |                     |                     |                     |
| (3,0,+A)    |                       | (2,0,+A)<br>4.8405                                             | (2,1,+A)<br>14.9043 | (4,0,+A)<br>16.1335 | (3,1,-A)<br>19.8701 | (4,1,+A)<br>26.1012 |                     |                     |                     |
|             | 7206.0457             | 7201.2052                                                      | 7191.1404           | 7189.9113           | 7186.1753           | 7179.9445           |                     |                     |                     |
|             | 7206.1043             | 7201.2638                                                      | 7191.1989           | 7189.9698           | 7186.2337           | 7180.003            |                     |                     |                     |
| (4,0,+A)    |                       | (3,0,+A)<br>9.6806                                             | (3,1,+A)<br>19.7031 | (5,0,+A)<br>24.1988 | (4,1,-A)<br>26.3795 | (5,1,+A)<br>34.0983 |                     |                     |                     |
|             | 7212.4348             | 7202.7542                                                      | 7192.7307           | 7188.2348           | 7186.0545           | 7178.3369           |                     |                     |                     |
|             | 7212.4732             | 7202.7926                                                      | 7192.769            | 7188.2735           | 7186.0927           | 7178.3752           |                     |                     |                     |
| (5,0,+A)    |                       | (4,0,+A)<br>16.1335                                            | (4,1,+A)<br>26.1012 | (6,0,+A)<br>33.8759 | (5,1,-A)<br>34.5156 | (6,1,+A)<br>43.694  |                     |                     |                     |
|             | 7220.4706             | 7204.3371                                                      | 7194.3699           | 7186.5946           | 7185.9547           | 7176.7775           |                     |                     |                     |
| (6,0,+A)    |                       | (5,0,+A)<br>24.1988                                            | (5,1,+A)<br>34.0983 | (6,1,-A)<br>44.2782 | (7,0,+A)<br>45.164  | (7,1,+A)<br>54.8878 |                     |                     |                     |
|             | 7230.0906             | 7205.8918                                                      | 7195.9926           | 7185.8121           | 7184.9264           | 7175.2039           |                     |                     |                     |
| (7,0,+A)    |                       | (6,0,+A)<br>33.8759                                            | (6,1,+A)<br>43.694  | (7,1,-A)<br>55.6666 | (8,0,+A)<br>58.0623 | (8,1,+A)<br>67.6792 |                     |                     |                     |
|             | 7241.3148             | 7207.4389                                                      | 7197.6211           | 7185.6484           | 7183.2526           | 7173.6368           |                     |                     |                     |
| (8,0,+A)    |                       | (7,0,+A)<br>45.164                                             | (7,1,+A)<br>54.8878 | (8,1,-A)<br>68.6803 | (9,0,+A)<br>72.5699 | (9,1,+A)<br>82.0677 |                     |                     |                     |
|             | 7254.1772             | 7209.0132                                                      | 7199.2894           | 7185.4964           | 7181.607            | 7172.1106           |                     |                     |                     |
| (1,1,+A)    |                       | (0,0,+A)<br>0                                                  | (2,0,+A)<br>4.8405  | (1,1,-A)<br>11.7328 | (2,1,+A)<br>14.9043 | (2,2,+A)<br>31.049  |                     |                     |                     |
|             | 7205.3378             | 7205.3378                                                      | 7200.4978           | 7193.6059           | 7190.433            | 7174.29             |                     |                     |                     |
| (1,1,-A)    |                       | (1,0,+A)<br>1.6135                                             | (1,1,+A)<br>11.7049 | (2,1,-A)<br>14.9878 | (2,2,-A)<br>31.0489 |                     |                     |                     |                     |
|             | 7205.3465             | 7203.733                                                       | 7193.6411           | 7190.3575           | 7174.2975           |                     |                     |                     |                     |
| (2,1,+A)    |                       | (1,0,+A)<br>1.6135                                             | (3,0,+A)<br>9.6806  | (1,1,+A)<br>11.7049 | (2,1,-A)<br>14.9878 | (3,1,+A)<br>19.7031 | (2,2,-A)<br>31.0489 | (3,2,+A)<br>35.8902 |                     |
|             | 7208.5211             | 7206.9076                                                      | 7198.841            | 7196.8169           | 7193.5341           | 7188.8176           | 7177.4732           | -                   |                     |
| (3,1,+A)    |                       | (2,0,+A)<br>4.8405                                             | (2,1,+A)<br>14.9043 | (4,0,+A)<br>16.1335 | (3,1,-A)<br>19.8701 | (4,1,+A)<br>26.1012 | (2,2,+A)<br>31.049  | (3,2,-A)<br>35.8898 | (4,2,+A)<br>42.345  |
|             | 7213.3014             | 7208.4609                                                      | 7198.3973           | 7197.168            | 7193.4312           | 7187.1994           | 7182.2522           | 7177.4121           | -                   |
| (4,1,+A)    |                       | (3,0,+A)<br>9.6806                                             | (3,1,+A)<br>19.7031 | (5,0,+A)<br>24.1988 | (4,1,-A)<br>26.3795 | (5,1,+A)<br>34.0983 | (3,2,+A)<br>35.8902 | (4,2,-A)<br>42.3438 | (5,2,+A)<br>50.4135 |
|             | 7219.6703             | 7209.9897                                                      | 7199.9673           | -                   | 7193.2897           | 7185.572            | 7183.7797           | 7177.3271           | -                   |
| (4,1,-A)    |                       | (4,0,+A)<br>16.1335                                            | (3,1,-A)<br>19.8701 | (4,1,+A)<br>26.1012 | (5,1,-A)<br>34.5156 | (3,2,-A)<br>35.8898 | (4,2,+A)<br>42.345  | (5,2,-A)<br>50.4108 |                     |
|             | 7219.9171             | 7203.7835                                                      | 7200.0467           | 7193.8154           | 7185.401            | 7184.0276           | 7177.5725           | 7169.507            |                     |
| (5,1,+A)    |                       | (4,0,+A)<br>16.1335                                            | (4,1,+A)<br>26.1012 | (6,0,+A)<br>33.8759 | (5,1,-A)<br>34.5156 | (4,2,+A)<br>42.345  | (6,1,+A)<br>43.694  | (5,2,-A)<br>50.4108 | (6,2,+A)<br>60.0956 |
|             | 7227.6228             | -                                                              | 7201.5216           | 7193.7459           | -                   | 7185.2771           | 7183.9281           | 7177.2118           | 7167.5284           |
| (5,1,-A)    |                       | (5,0,+A)<br>24.1988                                            | (4,1,-A)<br>26.3795 | (5,1,+A)<br>34.0983 | (4,2,-A)<br>42.3438 | (6,1,-A)<br>44.2782 | (5,2,+A)<br>50.4135 | (6,2,-A)<br>60.0903 |                     |
|             | 7227.9972             | 7203.7984                                                      | 7201.6171           | 7193.8989           | 7185.654            | 7183.7185           | 7177.5848           | 7167.9077           |                     |
| (2,2,-A)    |                       | (1,1,-A)<br>11.7328                                            | (2,1,+A)<br>14.9043 | (3,1,-A)<br>19.8701 | (2,2,+A)<br>31.049  | (3,2,-A)<br>35.8898 | (3,3,-A)<br>44.2928 |                     |                     |
|             | 7222.1465             | 7210.4137                                                      | 7207.2421           | 7202.2755           | -                   | 7186.2566           | 7177.8538           |                     |                     |
| (2,2,+A)    |                       | (1,1,+A)<br>11.7049                                            | (2,1,-A)<br>14.9878 | (3,1,+A)<br>19.7031 | (2,2,-A)<br>31.0489 | (3,2,+A)<br>35.8902 | (3,3,+A)<br>44.2928 |                     |                     |
|             | 7222.1286             | 7210.4237                                                      | 7207.1402           | 7202.4259           | 7191.0785           | -                   | 7177.8362           |                     |                     |
| (3,2,-A)    |                       | (2,1,-A)<br>14.9878                                            | (3,1,+A)<br>19.7031 | (4,1,-A)<br>26.3795 | (2,2,-A)<br>31.0489 | (3,2,+A)<br>35.8902 | (4,2,-A)<br>42.3438 | (3,3,+A)<br>44.2928 | (4,3,-A)<br>50.7463 |
|             | 7226.7977             | -                                                              | 7207.0946           | 7200.4178           | 7195.75             | 7190.9075           | 7184.4531           | 7182.5047           | 7176.0521           |
|             | 7226.9452             | -                                                              | 7207.2421           | 7200.5668           | 7195.8972           | 7191.0554           | 7184.6015           | 7182.6535           | -                   |
| (3,2,+A)    |                       | (2,1,+A)<br>14.9043                                            | (3,1,-A)<br>19.8701 | (4,1,+A)<br>26.1012 | (2,2,+A)<br>31.049  | (3,2,-A)<br>35.8898 | (4,2,+A)<br>42.345  | (3,3,-A)<br>44.2928 | (4,3,+A)<br>50.7463 |

|          |           |           |           |           |           |           |           |           |           |           |
|----------|-----------|-----------|-----------|-----------|-----------|-----------|-----------|-----------|-----------|-----------|
|          | 7226.9471 | 7212.0428 | 7207.076  | 7200.8449 | 7195.8972 | -         | 7184.6015 | 7182.6535 | 7176.2009 |           |
| (4,2,-A) |           | (3,1,-A)  | (4,1,+A)  | (5,1,-A)  | (3,2,-A)  | (4,2,+A)  | (3,3,-A)  | (5,2,-A)  | (4,3,+A)  | (5,3,-A)  |
|          |           | 19.8701   | 26.1012   | 34.5156   | 35.8898   | 42.345    | 44.2928   | 50.4108   | 50.7463   | 58.813    |
|          | 7233.3726 | -         | 7207.2713 | 7198.8569 | 7197.4835 | 7191.0269 | -         | -         | 7182.6262 | 7174.5608 |
| (1,+0,E) |           | (1,-1,E)  | (2,-1,E)  | (0,+0,E)  | (2,+0,E)  | (1,+1,E)  | (2,+1,E)  |           |           |           |
|          |           | 5.4897    | 8.7166    | 9.122     | 13.9628   | 16.2412   | 19.4686   |           |           |           |
|          | 7203.4676 | 7197.9778 | -         | 7194.3465 | 7189.5046 | 7187.2255 | 7183.9993 |           |           |           |
| (2,+0,E) |           | (1,-1,E)  | (2,-1,E)  | (1,+0,E)  | (3,-1,E)  | (1,+1,E)  | (3,+0,E)  | (2,+1,E)  | (3,+1,E)  |           |
|          |           | 5.4897    | 8.7166    | 10.7357   | 13.5565   | 16.2412   | 18.8026   | 19.4686   | 24.3097   |           |
|          | 7206.6771 | 7201.1873 | 7197.9613 | 7195.9415 | 7193.1195 | -         | 7187.8737 | 7187.2084 | 7182.367  |           |
| (3,+0,E) |           | (2,-1,E)  | (3,-1,E)  | (2,+0,E)  | (2,+1,E)  | (4,-1,E)  | (3,+1,E)  | (4,+0,E)  | (4,+1,E)  |           |
|          |           | 8.7166    | 13.5565   | 13.9628   | 19.4686   | 20.0091   | 24.3097   | 25.2542   | 30.7644   |           |
|          | 7211.4971 | 7202.7805 | 7197.9405 | 7197.5346 | 7192.0288 | 7191.4875 | 7187.1868 | 7186.2423 | 7180.7334 |           |
|          | 7211.5221 | 7202.8055 | -         | 7197.5588 | 7192.0525 | 7191.5118 | -         | 7186.2669 | 7180.7583 |           |
| (4,+0,E) |           | (3,-1,E)  | (3,+0,E)  | (4,-1,E)  | (3,+1,E)  | (5,-1,E)  | (4,+1,E)  | (5,+0,E)  | (5,+1,E)  |           |
|          |           | 13.5565   | 18.8026   | 20.0091   | 24.3097   | 28.0735   | 30.7644   | 33.3165   | 38.8326   |           |
|          | 7217.9081 | -         | 7199.1056 | 7197.8989 | 7193.5973 | -         | 7187.1425 | 7184.5908 | 7179.0755 |           |
|          | 7217.9401 | 7204.3836 | -         | 7197.9316 | 7193.6304 | 7189.8654 | 7187.1768 | 7184.6233 | 7179.1083 |           |
|          | 7218.01   | -         | 7199.2074 | 7198.0016 | 7193.6998 | 7189.9357 | 7187.2452 | 7184.693  | -         |           |
| (5,+0,E) |           | (4,-1,E)  | (4,+0,E)  | (5,-1,E)  | (4,+1,E)  | (6,-1,E)  | (5,+1,E)  | (6,+0,E)  | (6,+1,E)  |           |
|          |           | 20.0091   | 25.2542   | 28.0735   | 30.7644   | 37.7492   | 38.8326   | 42.9878   | 48.5142   |           |
|          | 7225.9442 | -         | 7200.69   | 7197.8708 | 7195.1802 | 7188.1942 | 7187.1114 | -         | 7177.4304 |           |
|          | 7225.9622 | 7205.9532 | 7200.708  | 7197.8886 | 7195.1979 | -         | 7187.1284 | 7182.9744 | 7177.4482 |           |
|          | 7226.0118 | 7206.0027 | 7200.7576 | -         | 7195.2481 | 7188.2623 | -         | 7183.0245 | 7177.4972 |           |
| (6,+0,E) |           | (5,-1,E)  | (5,+0,E)  | (6,-1,E)  | (5,+1,E)  | (6,+1,E)  | (7,-1,E)  | (7,+0,E)  | (7,+1,E)  |           |
|          |           | 28.0735   | 33.3165   | 37.7492   | 38.8326   | 48.5142   | 49.0352   | 54.2664   | 59.8092   |           |
|          | 7235.5791 | 7207.5055 | 7202.2624 | 7197.8301 | 7196.7464 | -         | 7186.5436 | 7181.313  | 7175.7699 |           |
|          | 7235.5916 | 7207.518  | 7202.2755 | 7197.8423 | 7196.7584 | 7187.0764 | 7186.5565 | 7181.3258 | -         |           |
| (7,+0,E) |           | (6,-1,E)  | (6,+0,E)  | (6,+1,E)  | (7,-1,E)  | (7,+1,E)  | (8,-1,E)  | (8,+0,E)  | (8,+1,E)  |           |
|          |           | 37.7492   | 42.9878   | 48.5142   | 49.0352   | 59.8092   | 61.9303   | 67.1503   | 72.7174   |           |
|          | 7246.8271 | 7209.0779 | 7203.839  | -         | 7197.7926 | 7187.0172 | 7184.8961 | 7179.6772 | 7174.1102 |           |
| (1,+1,E) |           | (0,+0,E)  | (1,+0,E)  | (2,+0,E)  | (2,+1,E)  | (2,+2,E)  |           |           |           |           |
|          |           | 9.122     | 10.7357   | 13.9628   | 19.4686   | 20.3003   |           |           |           |           |
|          | 7208.0876 | 7198.9655 | 7197.3513 | 7194.1245 | 7188.6182 | 7187.7868 |           |           |           |           |
| (2,-1,E) |           | (1,-1,E)  | (1,+0,E)  | (3,-1,E)  | (2,+0,E)  | (3,+0,E)  | (2,-2,E)  | (3,-2,E)  |           |           |
|          |           | 5.4897    | 10.7357   | 13.5565   | 13.9628   | 18.8026   | 22.841    | 27.6819   |           |           |
|          | 7204.6243 | -         | 7193.8885 | 7191.0666 | 7190.6607 | 7185.8212 | 7181.7831 | 7176.9429 |           |           |
| (2,+1,E) |           | (1,+0,E)  | (2,+0,E)  | (1,+1,E)  | (3,+0,E)  | (2,+2,E)  | (3,+1,E)  | (3,+2,E)  |           |           |
|          |           | 10.7357   | 13.9628   | 16.2412   | 18.8026   | 20.3003   | 24.3097   | 25.1412   |           |           |
|          | 7211.0455 | 7200.3098 | 7197.0817 | 7194.8052 | -         | 7190.7444 | 7186.7357 | 7185.9042 |           |           |
|          | 7211.366  | -         | 7197.4032 | 7195.1252 | 7192.5622 | 7191.0666 | 7187.0559 | 7186.224  |           |           |
| (4,-1,E) |           | (3,-1,E)  | (3,+0,E)  | (4,+0,E)  | (3,-2,E)  | (5,-1,E)  | (5,+0,E)  | (4,-2,E)  | (5,-2,E)  |           |
|          |           | 13.5565   | 18.8026   | 25.2542   | 27.6819   | 28.0735   | 33.3165   | 34.1368   | 42.2058   |           |
|          | 7215.8833 | 7202.3268 | 7197.0817 | 7190.6283 | 7188.2005 | 7187.8093 | 7182.5674 | 7181.7472 | 7173.6787 |           |
| (4,+1,E) |           | (3,+0,E)  | (3,+1,E)  | (3,+2,E)  | (4,+0,E)  | (4,+2,E)  | (5,+0,E)  | (5,+1,E)  | (5,+2,E)  |           |
|          |           | 18.8026   | 24.3097   | 25.1412   | 25.2542   | 31.5961   | 33.3165   | 38.8326   | 39.6651   |           |
|          | 7222.5387 | -         | 7198.229  | -         | 7197.2851 | 7190.942  | 7189.2211 | 7183.7059 | 7182.8744 |           |
| (5,-1,E) |           | (4,-1,E)  | (4,+0,E)  | (5,+0,E)  | (4,-2,E)  | (6,-1,E)  | (5,-2,E)  | (6,+0,E)  | (6,-2,E)  |           |
|          |           | 20.0091   | 25.2542   | 33.3165   | 34.1368   | 37.7492   | 42.2058   | 42.9878   | 51.8894   |           |
|          | 7223.9346 | 7203.9255 | 7198.6811 | 7190.6179 | 7189.7969 | 7186.1857 | 7181.7298 | 7180.9476 | -         |           |
| (5,+1,E) |           | (4,+0,E)  | (4,+1,E)  | (4,+2,E)  | (5,+0,E)  | (5,+2,E)  | (6,+0,E)  | (6,+1,E)  | (6,+2,E)  |           |
|          |           | 25.2542   | 30.7644   | 31.5961   | 33.3165   | 39.6651   | 42.9878   | 48.5142   | 49.3488   |           |
|          | 7230.6139 | 7205.3597 | 7199.8495 | 7199.0184 | 7197.2978 | 7190.9483 | 7187.6255 | 7182.0996 | 7181.2656 |           |
| (6,-1,E) |           | (5,-1,E)  | (5,+0,E)  | (5,-2,E)  | (6,+0,E)  | (7,-1,E)  | (6,-2,E)  | (7,+0,E)  | (7,-2,E)  |           |
|          |           | 28.0735   | 33.3165   | 42.2058   | 42.9878   | 49.0352   | 51.8894   | 54.2664   | 63.188    |           |
|          | 7233.5255 | 7205.4519 | 7200.208  | -         | -         | 7184.4895 | 7181.6354 | 7179.2584 | 7170.3386 |           |
| (6,+1,E) |           | (5,+0,E)  | (5,+1,E)  | (5,+2,E)  | (6,+0,E)  | (6,+2,E)  | (7,+0,E)  | (7,+1,E)  | (7,+2,E)  |           |
|          |           | 33.3165   | 38.8326   | 39.6651   | 42.9878   | 49.3488   | 54.2664   | 59.8092   | 60.6473   |           |
|          | 7240.2327 | -         | 7201.4001 | 7200.5668 | 7197.2447 | 7190.8838 | 7185.9656 | 7180.4239 | 7179.5857 |           |
| (7,-1,E) |           | (6,-1,E)  | (6,+0,E)  | (6,-2,E)  | (7,+0,E)  | (8,-1,E)  | (7,-2,E)  | (8,+0,E)  | (8,-2,E)  |           |
|          |           | 37.7492   | 42.9878   | 51.8894   | 54.2664   | 61.9303   | 63.188    | 67.1503   | 76.1021   |           |
|          | 7244.792  | 7207.0428 | 7201.8037 | -         | 7190.5253 | 7182.8625 | -         | 7177.6428 | 7168.6908 |           |
| (7,+1,E) |           | (6,+0,E)  | (6,+1,E)  | (6,+2,E)  | (7,+0,E)  | (7,+2,E)  | (8,+0,E)  | (8,+1,E)  | (8,+2,E)  |           |
|          |           | 42.9878   | 48.5142   | 49.3488   | 54.2664   | 60.6473   | 67.1503   | 72.7174   | 73.5611   |           |
|          | 7251.466  | 7208.4782 | 7202.9515 | 7202.1166 | 7197.1994 | -         | -         | 7178.7485 | 7177.9054 |           |
|          | 7251.504  | -         | 7202.9898 | -         | 7197.237  | 7190.8556 | 7184.3535 | 7178.7866 | 7177.9427 |           |
| (8,-1,E) |           | (7,-1,E)  | (7,+0,E)  | (7,-2,E)  | (8,+0,E)  | (8,-2,E)  | (9,-1,E)  | (9,+0,E)  | (9,-2,E)  |           |

|           |           |           |           |           |           |           |           |           |
|-----------|-----------|-----------|-----------|-----------|-----------|-----------|-----------|-----------|
|           | 49.0352   | 54.2664   | 63.188    | 67.1503   | 76.1021   | 76.4335   | 81.637    | 90.6322   |
| 7257.6401 | 7208.605  | 7203.3725 | -         | 7190.4889 | 7181.538  | -         | 7176.0024 | 7167.0086 |
| (2,+2,E)  | (1,+1,E)  | (2,+1,E)  | (3,+1,E)  | (3,+2,E)  | (3,+3,E)  |           |           |           |
|           | 16.2412   | 19.4686   | 24.3097   | 25.1412   | 42.8417   |           |           |           |
| 7215.7063 | 7199.4651 | 7196.2377 | 7191.3958 | 7190.5642 | 7172.8655 |           |           |           |
| (3,+2,E)  | (2,+1,E)  | (2,+2,E)  | (3,+1,E)  | (4,+1,E)  | (4,+2,E)  | (3,+3,E)  | (4,+3,E)  |           |
|           | 19.4686   | 20.3003   | 24.3097   | 30.7644   | 31.5961   | 42.8417   | 49.2953   |           |
| 7220.5469 | 7201.0783 | 7200.2465 | 7196.2377 | 7189.7819 | 7188.95   | 7177.7055 | -         |           |
| (4,+2,E)  | (3,+1,E)  | (3,+2,E)  | (4,+1,E)  | (5,+1,E)  | (5,+2,E)  | (3,+3,E)  | (4,+3,E)  | (5,+3,E)  |
|           | 24.3097   | 25.1412   | 30.7644   | 38.8326   | 39.6651   | 42.8417   | 49.2953   | 57.3624   |
| 7226.9858 | 7202.6761 | 7201.8446 | 7196.2214 | 7188.152  | 7187.32   | -         | 7177.6894 | 7169.6245 |
| (5,+2,E)  | (4,+1,E)  | (4,+2,E)  | (5,+1,E)  | (6,+1,E)  | (4,+3,E)  | (6,+2,E)  | (5,+3,E)  | (6,+3,E)  |
|           | 30.7644   | 31.5961   | 38.8326   | 48.5142   | 49.2953   | 49.3488   | 57.3624   | 67.0428   |
| 7235.0165 | 7204.2522 | 7203.42   | 7196.1836 | 7186.5021 | 7185.7206 | 7185.667  | 7177.6549 | 7167.9743 |
| (6,+2,E)  | (5,+1,E)  | (5,+2,E)  | (6,+1,E)  | (5,+3,E)  | (7,+1,E)  | (7,+2,E)  | (6,+3,E)  | (7,+3,E)  |
|           | 38.8326   | 39.6651   | 48.5142   | 57.3624   | 59.8092   | 60.6473   | 67.0428   | 78.3367   |
| 7244.6666 | 7205.8341 | 7205.0014 | 7196.1531 | -         | 7184.857  | 7184.0189 | 7177.6246 | -         |
| (7,+2,E)  | (6,+1,E)  | (6,+2,E)  | (7,+1,E)  | (6,+3,E)  | (8,+1,E)  | (8,+2,E)  | (7,+3,E)  | (8,+3,E)  |
|           | 48.5142   | 49.3488   | 59.8092   | 67.0428   | 72.7174   | 73.5611   | 78.3367   | 91.2441   |
| 7255.9099 | 7207.3956 | 7206.5612 | 7196.1017 | 7188.8663 | 7183.1922 | 7182.3486 | 7177.5725 | -         |

Table 2: List of tentatively assigned CDMs. The energy of the transitions are the experimental ones. Energies of non-observed transitions are labeled by a dash symbol.

| upper state | E (cm <sup>-1</sup> ) | lower state E (cm <sup>-1</sup> ), lines E (cm <sup>-1</sup> ) |           |           |           |           |           |           |           |           |
|-------------|-----------------------|----------------------------------------------------------------|-----------|-----------|-----------|-----------|-----------|-----------|-----------|-----------|
| (1,0,+A)    |                       | (0,0,+A)                                                       | (2,0,+A)  | (1,1,-A)  | (2,1,+A)  |           |           |           |           |           |
|             |                       | 0                                                              | 4.8405    | 11.7328   | 14.9043   |           |           |           |           |           |
|             | 7205.3378             | 7205.3378                                                      | 7200.4978 | 7193.6059 | 7190.433  |           |           |           |           |           |
| (2,0,+A)    |                       | (1,0,+A)                                                       | (3,0,+A)  | (1,1,+A)  | (2,1,-A)  | (3,1,+A)  |           |           |           |           |
|             |                       | 1.6135                                                         | 9.6806    | 11.7049   | 14.9878   | 19.7031   |           |           |           |           |
|             | 7208.5211             | 7206.9076                                                      | 7198.841  | 7196.8169 | 7193.5341 | 7188.8176 |           |           |           |           |
| (2,1,-A)    |                       | (2,0,+A)                                                       | (1,1,-A)  | (2,1,+A)  | (3,1,-A)  | (2,2,+A)  | (3,2,-A)  |           |           |           |
|             |                       | 4.8405                                                         | 11.7328   | 14.9043   | 19.8701   | 31.049    | 35.8898   |           |           |           |
|             | 7208.6052             | 7203.7647                                                      | 7196.8717 | 7193.6998 | -         | 7177.556  | 7172.7151 |           |           |           |
| (3,0,+A)    |                       | (2,0,+A)                                                       | (2,1,+A)  | (4,0,+A)  | (3,1,-A)  | (4,1,+A)  |           |           |           |           |
|             |                       | 4.8405                                                         | 14.9043   | 16.1335   | 19.8701   | 26.1012   |           |           |           |           |
|             | 7213.3014             | 7208.4609                                                      | 7198.3973 | 7197.168  | 7193.4312 | 7187.1994 |           |           |           |           |
| (3,+1,E)    |                       | (2,+0,E)                                                       | (3,+0,E)  | (2,+1,E)  | (2,+2,E)  | (3,+2,E)  | (4,+0,E)  | (4,+1,E)  | (4,+2,E)  |           |
|             |                       | 13.9628                                                        | 18.8026   | 19.4686   | 20.3003   | 25.1412   | 25.2542   | 30.7644   | 31.5961   |           |
|             | 7215.9894             | 7202.0266                                                      | -         | 7196.5219 | 7195.6888 | 7190.8479 | 7190.7354 | 7185.2255 | -         |           |
|             | 7216.1683             | -                                                              | 7197.3657 | 7196.6991 | 7195.867  | 7191.0269 | 7190.9153 | -         | 7184.5713 |           |
| (4,0,+A)    |                       | (3,0,+A)                                                       | (3,1,+A)  | (5,0,+A)  | (4,1,-A)  | (5,1,+A)  |           |           |           |           |
|             |                       | 9.6806                                                         | 19.7031   | 24.1988   | 26.3795   | 34.0983   |           |           |           |           |
|             | 7219.686              | 7210.0054                                                      | 7199.9833 | 7195.4871 | 7193.3057 | 7185.5878 |           |           |           |           |
| (4,2,-A)    |                       | (3,1,-A)                                                       | (4,1,+A)  | (5,1,-A)  | (3,2,-A)  | (4,2,+A)  | (3,3,-A)  | (5,2,-A)  | (4,3,+A)  | (5,3,-A)  |
|             |                       | 19.8701                                                        | 26.1012   | 34.5156   | 35.8898   | 42.345    | 44.2928   | 50.4108   | 50.7463   | 58.813    |
|             | 7233.2743             | -                                                              | 7207.1731 | 7198.7576 | 7197.3855 | 7190.9297 | -         | 7182.8625 | 7182.5279 | 7174.4626 |
| (5,2,-A)    |                       | (4,1,-A)                                                       | (5,1,+A)  | (4,2,-A)  | (6,1,-A)  | (5,2,+A)  | (4,3,-A)  | (5,3,+A)  | (6,2,-A)  | (6,3,-A)  |
|             |                       | 26.3795                                                        | 34.0983   | 42.3438   | 44.2782   | 50.4135   | 50.7463   | 58.813    | 60.0903   | 68.4927   |
|             | 7241.3805             | -                                                              | 7207.2821 | 7199.0374 | 7197.1012 | 7190.9659 | 7190.6343 | 7182.5674 | 7181.29   | -         |
| (8,+0,E)    |                       | (7,-1,E)                                                       | (7,+0,E)  | (7,+1,E)  | (8,-1,E)  | (8,+1,E)  | (9,-1,E)  | (9,+0,E)  | (9,+1,E)  |           |
|             |                       | 49.0352                                                        | 54.2664   | 59.8092   | 61.9303   | 72.7174   | 76.4335   | 81.637    | 87.2386   |           |
|             | 7259.6455             | -                                                              | 7205.3791 | 7199.836  | 7197.7149 | 7186.927  | 7183.2108 | 7178.0081 | 7172.4079 |           |
| (9,1,-A)    |                       | (8,1,-A)                                                       | (9,0,+A)  | (9,1,+A)  | (8,2,-A)  | (9,2,+A)  | (10,1,-A) |           |           |           |
|             |                       | 68.6803                                                        | 72.5699   | 82.0677   | 84.285    | 98.8239   | 99.581    |           |           |           |
|             | 7276.6885             | 7208.0082                                                      | 7204.1195 | 7194.6216 | -         | 7177.8638 | 7177.1084 |           |           |           |
